# Supplementary material
Source: Springer Nature journal article supplement (https://www.springerprofessional.de/resource/supplementary/13638_2011_470_MOESM6_ESM.pdf/11897724)

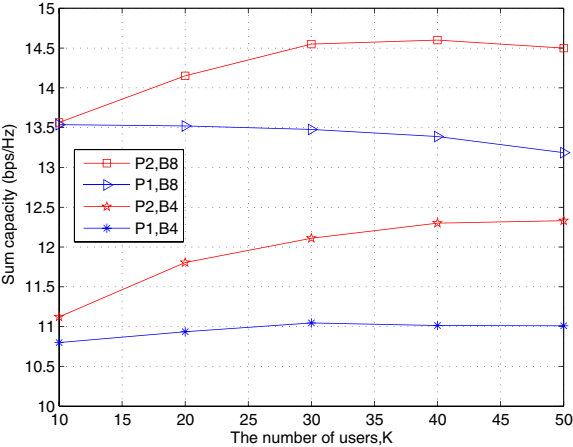

Supplement: MOESM6 [file 11897724]
